# Supplementary material for: Optimisation of Mo doping to form NiCoMo ternary sulphides for high performance charge storage
Source: Royal Society of Chemistry journal article supplement (doi:10.1039/d4dt01776e), 2024-01-01
Supplement: d4dt01776e1.pdf [file d4dt01776e1.pdf]

## Optimisation of Mo doping to form NiCoMo ternary sulphides for high performance charge storage.

a. School of Materials Science and Engineering, Nanchang University, Nanchang  
330031, China

### Figure Captions

**Fig. S1.** SEM images of (a)  $N_1C_1$ , (b)  $N_1C_2$ , (c)  $N_2C_1S_{0.05}$ , (d)  $N_2C_1S_{0.08}$ , (e)  $N_2C_1S_{0.1}$  and (f)  $N_2C_1S_{0.3}$

**Fig. S2.** SEM image of  $Ni_2Co_1MS_{0.2-2}$  electrode after cycling.

**Fig. S3.** (a) XPS full spectrum of after cycling test; (b), (c), (d), (e) and (f) spectra of Ni, Co, Mo, S and O, respectively.

**Fig. S4.** XRD plots of  $N_2C_1MS_{0.2-2}$  electrodes after cycling.

**Fig. S5.** (a) and (b) show the CV and GCD curves of  $N_1C_1$ ,  $N_1C_2$  and  $N_2C_1$  electrodes at  $5\text{ mV}\cdot\text{s}^{-1}$  scan rate and  $1\text{ A}\cdot\text{g}^{-1}$  current density; (c) and (d) show the CV and GCD curves of nickel-cobalt sulphide electrodes prepared with different sulphur additions at  $5\text{ mV}\cdot\text{s}^{-1}$  scan rate and  $1\text{ A}\cdot\text{g}^{-1}$  current density.

**Fig. S6.** (a) CV curves of the  $N_2C_1$  electrode at different scan rates and (b) GCD curves at different current densities.

**Fig. S7.** (a) CV curves of the  $N_2C_1S_{0.2}$  electrode at different scan rates and (b) GCD curves at different current densities.

**Fig. S8.** (a) CV curves of the  $N_2C_1MS_{0.2-1}$  electrode at different scan rates and (b) GCD curves at different current densities.

**Fig. S9.** (a) CV curves of the  $N_2C_1MS_{0.2-3}$  electrode at different scan rates and (b) GCD curves at different current densities.

**Fig. S10.** Cycle performance graph of  $N_2C_1MS_{0.2-2}$  electrode.

**Fig. S11.** CV curves of  $N_2C_1MS_{0.2-2}$  electrode and AC at  $10\text{ mV}\cdot\text{s}^{-1}$  scan rate.

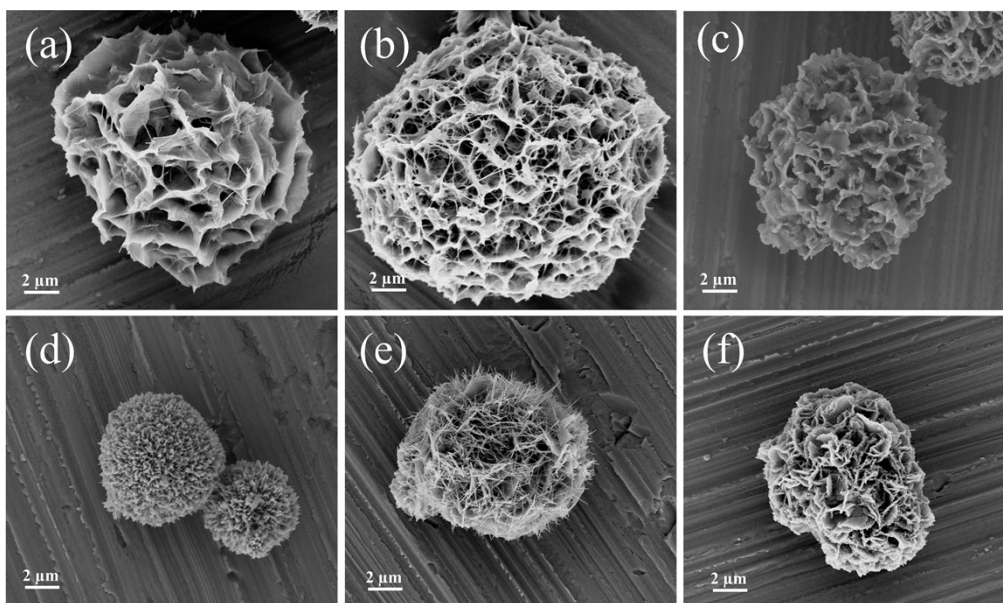

**Fig. S1.** SEM images of (a)  $N_1C_1$ , (b)  $N_1C_2$ , (c)  $N_2C_1S_{0.05}$ , (d)  $N_2C_1S_{0.08}$ , (e)  $N_2C_1S_{0.1}$  and (f)  $N_2C_1S_{0.3}$

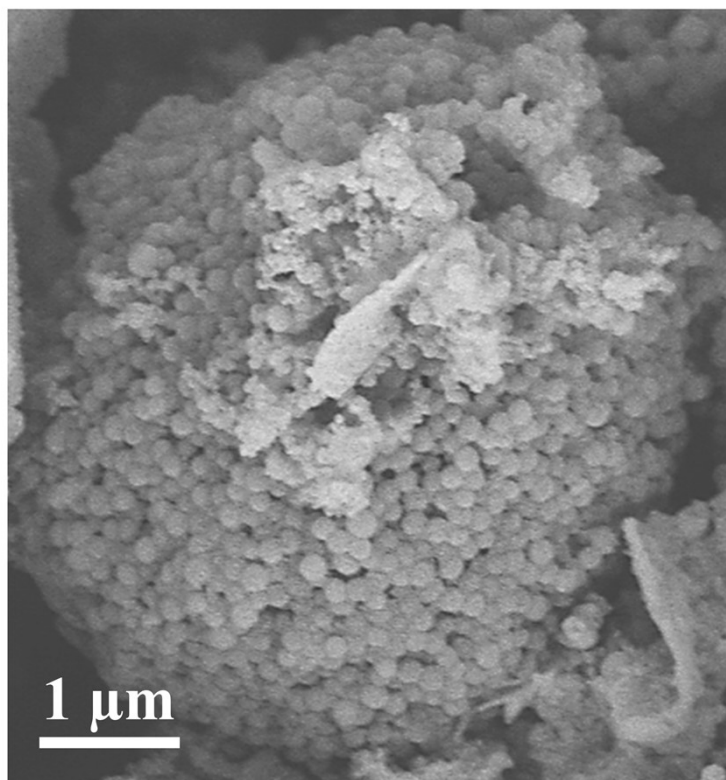

**Fig. S2.** SEM image of Ni<sub>2</sub>Co<sub>1</sub>MS<sub>0.2-2</sub> electrode after cycling.

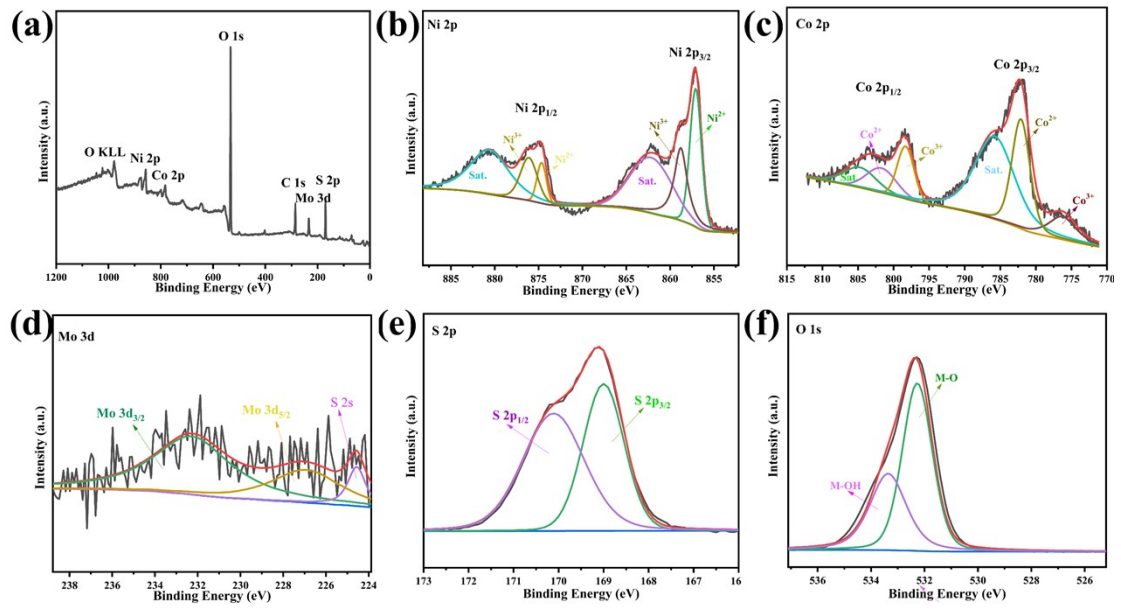

**Fig. S3.** (a) XPS full spectrum of after cycling test; (b), (c), (d), (e) and (f) spectra of Ni, Co, Mo, S and O, respectively.

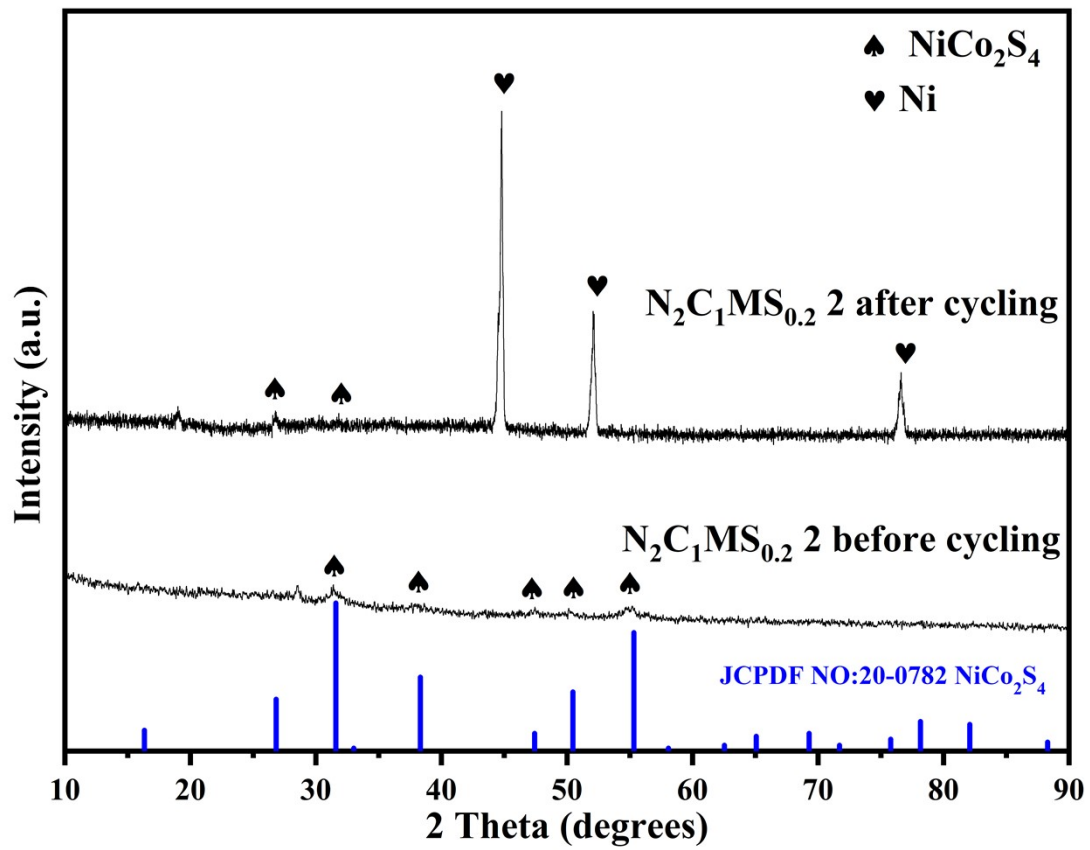

Fig. S4. Full XPS spectra after cycling of  $N_2C_1MS_{0.2} 2$  electrodes.

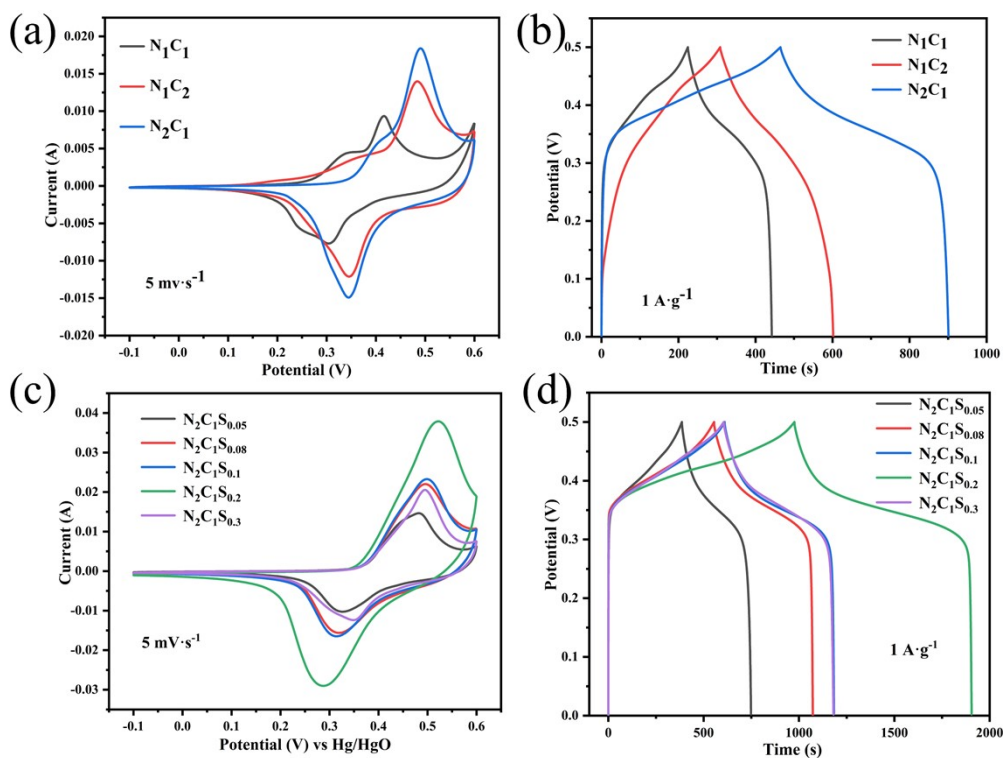

**Fig. S5.** (a) and (b) show the CV and GCD curves of  $N_1C_1$ ,  $N_1C_2$  and  $N_2C_1$  electrodes at  $5 \text{ mV}\cdot\text{s}^{-1}$  scan rate and  $1 \text{ A}\cdot\text{g}^{-1}$  current density; (c) and (d) show the CV and GCD curves of nickel-cobalt sulphide electrodes prepared with different sulphur additions at  $5 \text{ mV}\cdot\text{s}^{-1}$  scan rate and  $1 \text{ A}\cdot\text{g}^{-1}$  current density.

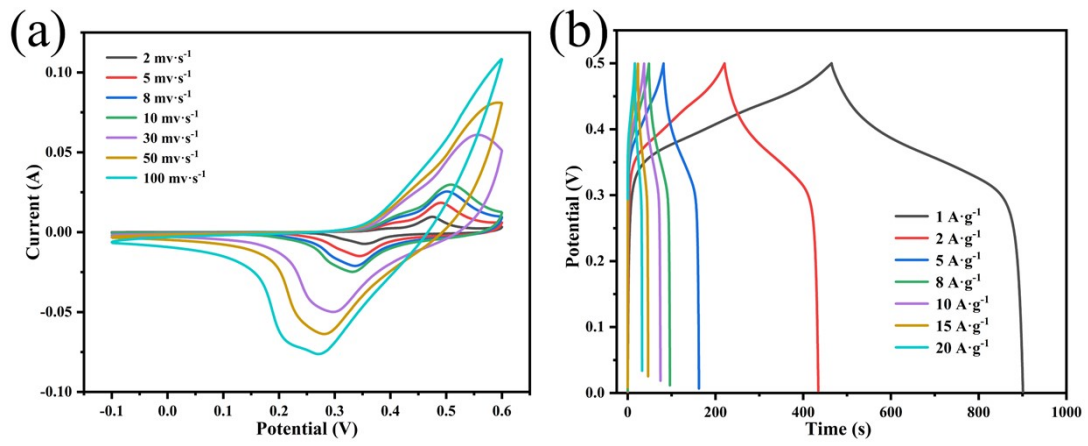

**Fig. S6.** (a) CV curves of the  $N_2C_1$  electrode at different scan rates and (b) GCD curves at different current densities.

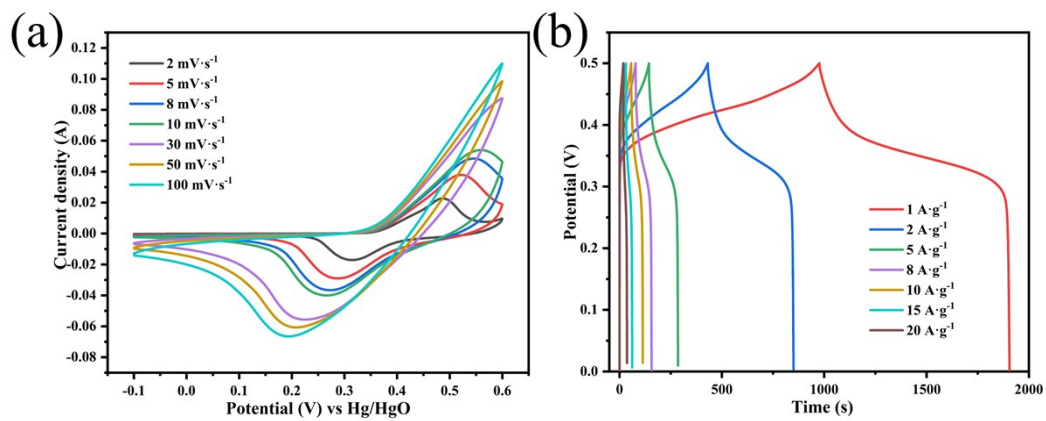

**Fig. S7.** (a) CV curves of the  $N_2C_1S_{0.2}$  electrode at different scan rates and (b) GCD curves at different current densities.



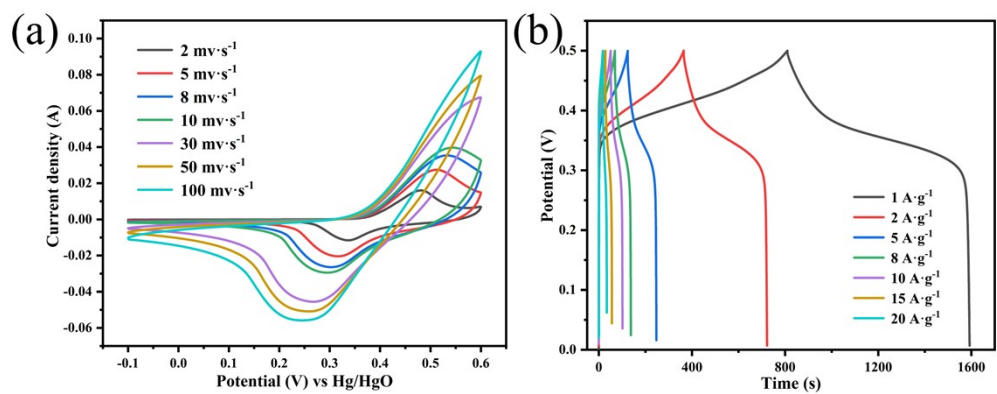

**Fig. S8.** (a) CV curves of the  $N_2C_1MS_{0.2-1}$  electrode at different scan rates and (b) GCD curves at different current densities.

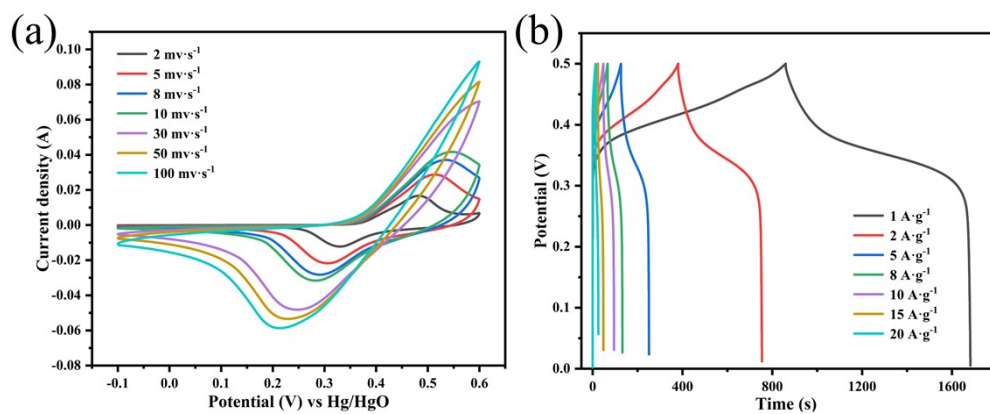

**Fig. S9.** (a) CV curves of the  $N_2C_1MS_{0.2-3}$  electrode at different scan rates and (b) GCD curves at different current densities.

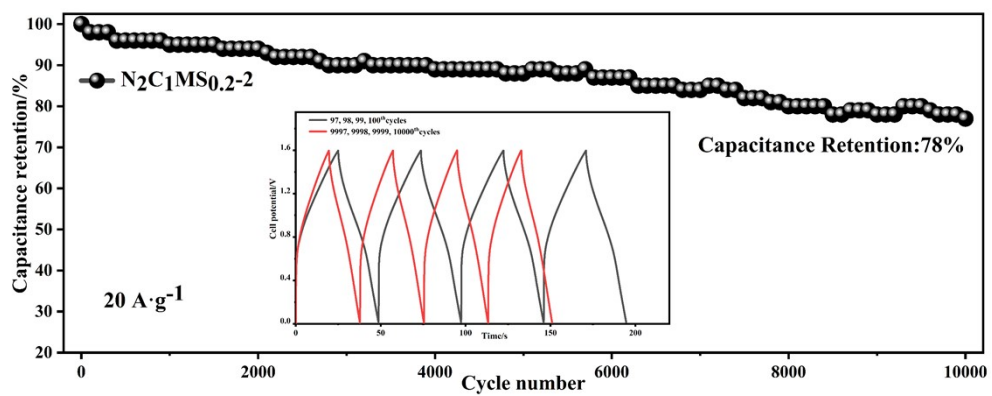

Fig. S10. Cycle performance graph of  $N_2C_1MS_{0.2-2}$  electrode.

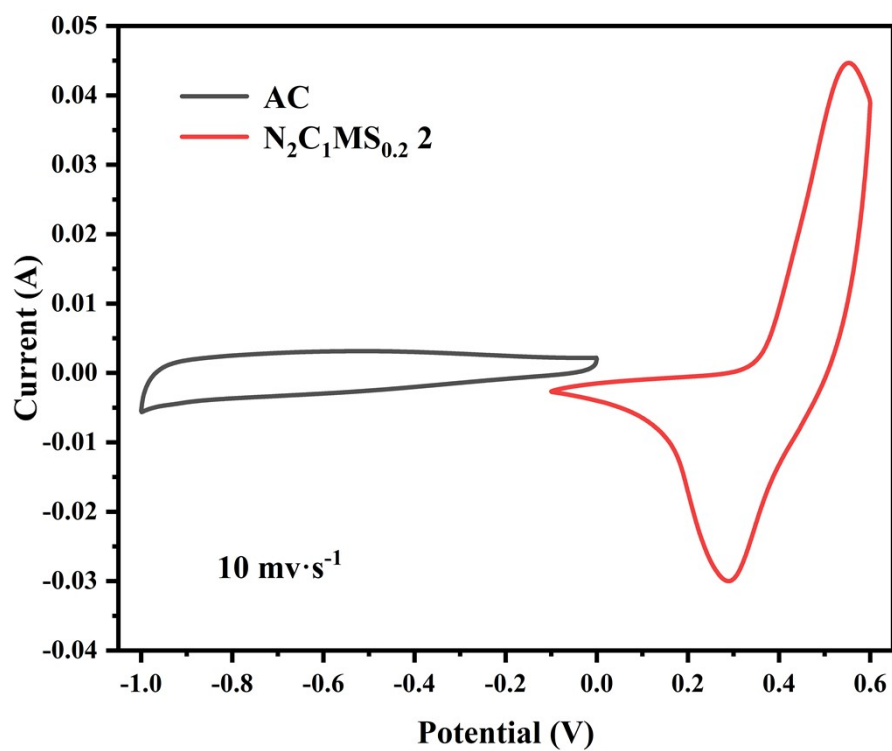

**Fig. S11.** CV curves of N<sub>2</sub>C<sub>1</sub>MS<sub>0.2</sub>-2 electrode and AC at 10 mV·s<sup>-1</sup> scan rate.
